# Supplementary material for: Ultraviolet A light effectively reduces bacteria and viruses including coronavirus
Source: PubMed Central journal article supplement (PMC7365468; doi:10.1371/journal.pone.0236199), 2020-07-16
Supplement: pone.0236199.s006.pdf [file pone.0236199.s006.pdf]

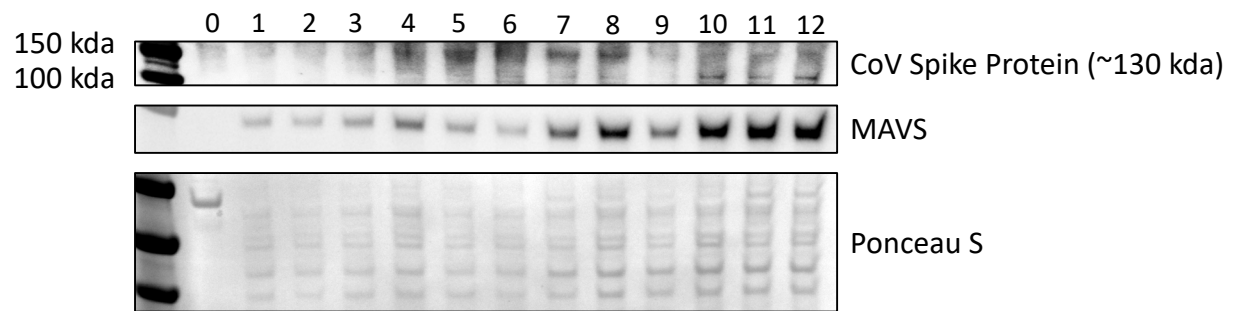

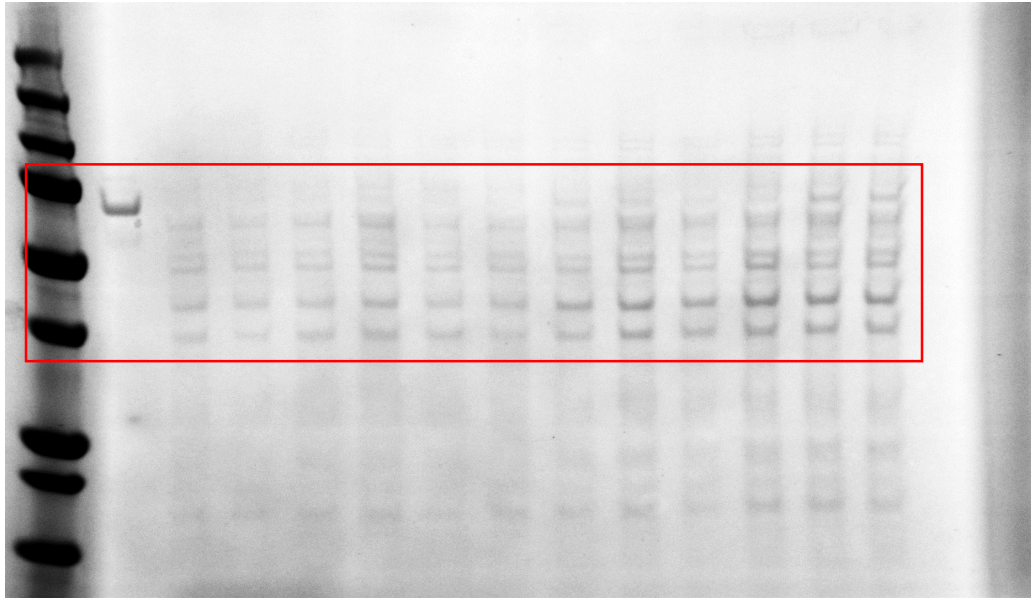

Ponceau S

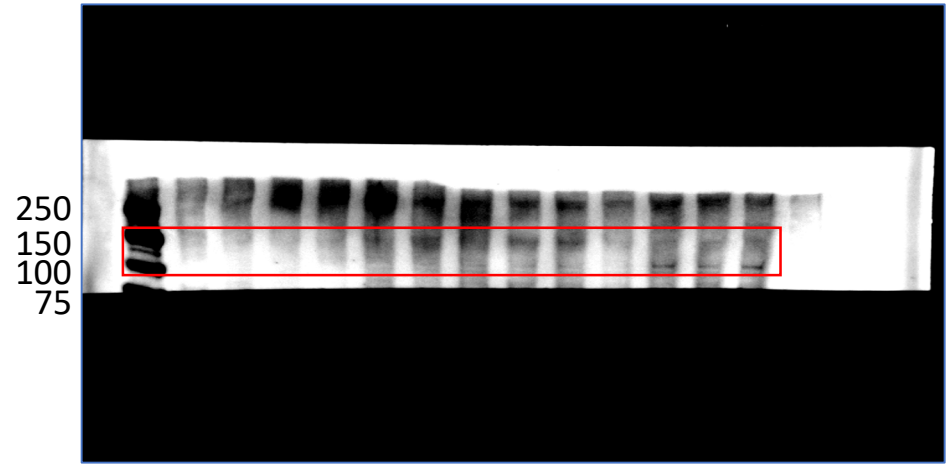

CoV Spike Protein (~130 kda)

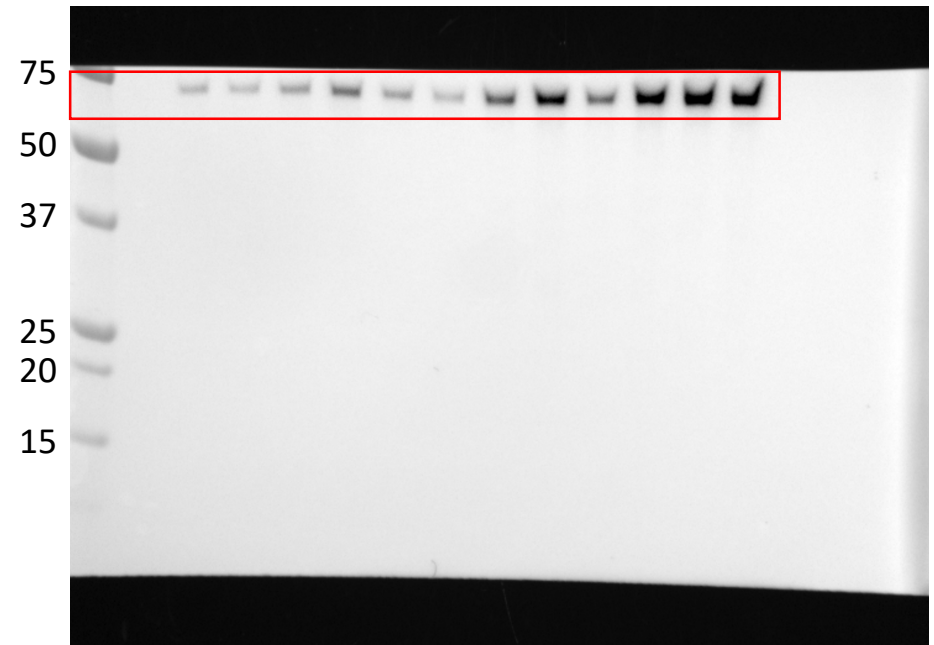

MAVS (~75 kda)
